# Supplementary material
Source: HighWire-hosted journal article supplement (https://bmjopen.bmj.com/content/9/11/e031537)
Supplement: inline-supplementary-material-1 [file inline-supplementary-material-1.pdf]

## Appendices

### Supplementary Text 1. Detailed alcohol-use definitions

- i. Any code suggesting that alcohol was discussed in the consultation (**Supplementary Table 1**, Column 1).
- ii. Codes indicating AUDIT or FAST screening (**Supplementary Table 1**, Columns 4 and 5)
- iii. Codes quantifying alcohol use, comprised of:
  - a. Drinking status (categorised as current drinker, ex drinker, non drinker; recorded in:
    - Read codes (**Supplementary Table 1**, Column 2)
    - Structured data, using data from the CPRD Additional Clinical Details file recorded under Entity Type 5, data field 1 (status) (Entity Type is the identifier that represents the structured data area in Vision where the data was entered)
  - b. Level of drinking (non, light, moderate, heavy drinker; as recorded in Read codes (**Supplementary Table 1**, Column 3))
  - c. Alcohol units consumed per week, using an existing (CALIBER: <https://www.ucl.ac.uk/health-informatics/caliber>) variable definition for 'number of alcohol unit consumption per week recorded in primary care (CPRD)',[1] using data from the CPRD Additional Clinical Details file recorded under Entity Type 5, data field 2 (units per week). We categorised units per week as: "None", "1-14", "15-42" or "43+" units per week. 14 units per week is the recommended limit for men and women according to current UK government guidelines.[2]
  - d. AUDIT or FAST scores (AUDIT categorised according to WHO guidelines on risk level: 1-7 - low risk drinking; 8-15 - hazardous drinking; 16-19 - harmful drinking; 20-40 – possible dependence.[3]). Scores resulting from AUDIT/FAST screening (i.e. associated with a Read morbidity code indicating use of AUDIT/FAST), were obtained from the Additional Clinical Details file under Entity Type 172.

**Supplementary Table 1.** Read codes for alcohol data in CPRD (code lists also available for download: <https://doi.org/10.17037/data.00001071>).

| CPRD medcode | Read code | Clinical term                                 | 1<br>Any alcohol-related code | 2<br>Current drinking status | 3<br>Codes indicating level of alcohol use | 4<br>AUDIT screening | 5<br>FAST screening |
|--------------|-----------|-----------------------------------------------|-------------------------------|------------------------------|--------------------------------------------|----------------------|---------------------|
| 47555        | 90.95     | cerebral degeneration due to alcoholism       | 1                             | 0                            | 0                                          | 0                    | 0                   |
| 27           | 136..00   | alcohol consumption                           | 1                             | 0                            | 0                                          | 0                    | 0                   |
| 12949        | 1361.00   | Teetotaler                                    | 1                             | non                          | non                                        | 0                    | 0                   |
| 12970        | 1361.11   | non drinker alcohol                           | 1                             | non                          | non                                        | 0                    | 0                   |
| 4447         | 1361.12   | non-drinker alcohol                           | 1                             | non                          | non                                        | 0                    | 0                   |
| 12975        | 1362.00   | trivial drinker - <1u/day                     | 1                             | curr                         | L                                          | 0                    | 0                   |
| 385          | 1362.11   | drinks rarely                                 | 1                             | curr                         | L                                          | 0                    | 0                   |
| 749          | 1362.12   | drinks occasionally                           | 1                             | curr                         | L                                          | 0                    | 0                   |
| 12972        | 1363.00   | light drinker - 1-2u/day                      | 1                             | curr                         | L                                          | 0                    | 0                   |
| 322          | 1364.00   | moderate drinker - 3-6u/day                   | 1                             | curr                         | M                                          | 0                    | 0                   |
| 1618         | 1365.00   | heavy drinker - 7-9u/day                      | 1                             | curr                         | H                                          | 0                    | 0                   |
| 12977        | 1366.00   | very heavy drinker - >9u/day                  | 1                             | curr                         | H                                          | 0                    | 0                   |
| 967          | 1367.00   | stopped drinking alcohol                      | 1                             | ex                           | non                                        | 0                    | 0                   |
| 12978        | 1368.00   | alcohol consumption unknown                   | 1                             | 0                            | 0                                          | 0                    | 0                   |
| 12976        | 1369.00   | suspect alcohol abuse - denied                | 1                             | 0                            | 0                                          | 0                    | 0                   |
| 22933        | 136A.00   | ex-trivial drinker (<1u/day)                  | 1                             | 0                            | 0                                          | 0                    | 0                   |
| 102665       | 136a.00   | increasing risk drinking                      | 1                             | curr                         | H                                          | 0                    | 0                   |
| 26471        | 136B.00   | ex-light drinker - (1-2u/day)                 | 1                             | 0                            | 0                                          | 0                    | 0                   |
| 99877        | 136b.00   | feels should cut down drinking                | 1                             | curr                         | H                                          | 0                    | 0                   |
| 19495        | 136C.00   | ex-moderate drinker - (3-6u/d)                | 1                             | 0                            | 0                                          | 0                    | 0                   |
| 102448       | 136c.00   | higher risk drinking                          | 1                             | curr                         | H                                          | 0                    | 0                   |
| 19493        | 136D.00   | ex-heavy drinker - (7-9u/day)                 | 1                             | 0                            | 0                                          | 0                    | 0                   |
| 103230       | 136d.00   | lower risk drinking                           | 1                             | curr                         | M                                          | 0                    | 0                   |
| 12983        | 136E.00   | ex-very heavy drinker->9u/d)                  | 1                             | 0                            | 0                                          | 0                    | 0                   |
| 106560       | 136e.00   | declines to state current alcohol consumption | 1                             | 0                            | 0                                          | 0                    | 0                   |
| 12971        | 136F.00   | spirit drinker                                | 1                             | curr                         | 0                                          | 0                    | 0                   |
| 2689         | 136G.00   | beer drinker                                  | 1                             | curr                         | 0                                          | 0                    | 0                   |
| 12968        | 136H.00   | drinks beer and spirits                       | 1                             | curr                         | 0                                          | 0                    | 0                   |
| 12969        | 136I.00   | drinks wine                                   | 1                             | curr                         | 0                                          | 0                    | 0                   |
| 956          | 136J.00   | social drinker                                | 1                             | curr                         | M                                          | 0                    | 0                   |

| CPRD medcode | Read code | Clinical term                                                | 1<br>Any alcohol-related code | 2<br>Current drinking status | 3<br>Codes indicating level of alcohol use | 4<br>AUDIT screening | 5<br>FAST screening |
|--------------|-----------|--------------------------------------------------------------|-------------------------------|------------------------------|--------------------------------------------|----------------------|---------------------|
| 12982        | 136K.00   | alcohol intake above recommended sensible limits             | 1                             | curr                         | H                                          | 0                    | 0                   |
| 26472        | 136L.00   | alcohol intake within recommended sensible limits            | 1                             | curr                         | M                                          | 0                    | 0                   |
| 12979        | 136M.00   | current non drinker                                          | 1                             | non                          | non                                        | 0                    | 0                   |
| 12980        | 136N.00   | light drinker                                                | 1                             | curr                         | L                                          | 0                    | 0                   |
| 12985        | 136O.00   | moderate drinker                                             | 1                             | curr                         | M                                          | 0                    | 0                   |
| 8999         | 136P.00   | heavy drinker                                                | 1                             | curr                         | H                                          | 0                    | 0                   |
| 12984        | 136Q.00   | very heavy drinker                                           | 1                             | curr                         | H                                          | 0                    | 0                   |
| 19401        | 136R.00   | binge drinker                                                | 1                             | curr                         | H                                          | 0                    | 0                   |
| 19494        | 136S.00   | hazardous alcohol use                                        | 1                             | curr                         | H                                          | 0                    | 0                   |
| 30695        | 136T.00   | harmful alcohol use                                          | 1                             | curr                         | H                                          | 0                    | 0                   |
| 93415        | 136V.00   | alcohol units per week                                       | 1                             | 0                            | 0                                          | 0                    | 0                   |
| 94670        | 136W.00   | alcohol misuse                                               | 1                             | curr                         | H                                          | 0                    | 0                   |
| 97126        | 136X.00   | alcohol units consumed on heaviest drinking day              | 1                             | 0                            | 0                                          | 0                    | 0                   |
| 101718       | 136Y.00   | drinks in morning to get rid of hangover                     | 1                             | curr                         | 0                                          | 0                    | 0                   |
| 12981        | 136Z.00   | alcohol consumption nos                                      | 1                             | 0                            | 0                                          | 0                    | 0                   |
| 18156        | 13Y8.00   | alcoholics anonymous                                         | 1                             | 0                            | 0                                          | 0                    | 0                   |
| 84218        | 13ZY.00   | disqualified from driving due to excess alcohol              | 1                             | 0                            | 0                                          | 0                    | 0                   |
| 8430         | 1462.00   | h/o: alcoholism                                              | 1                             | 0                            | 0                                          | 0                    | 0                   |
| 38061        | 1B1c.00   | alcohol induced hallucinations                               | 1                             | curr                         | 0                                          | 0                    | 0                   |
| 44783        | 1D19.00   | pain in lymph nodes after alcohol consumption                | 1                             | 0                            | 0                                          | 0                    | 0                   |
| 24735        | 2577.00   | o/e - breath - alcohol smell                                 | 1                             | curr                         | 0                                          | 0                    | 0                   |
| 10161        | 2577.11   | o/e - alcoholic breath                                       | 1                             | curr                         | 0                                          | 0                    | 0                   |
| 69691        | 388j.00   | cage questionnaire                                           | 1                             | 0                            | 0                                          | 0                    | 0                   |
| 70161        | 388j.00   | cage questionnaire                                           | 1                             | 0                            | 0                                          | 0                    | 0                   |
| 93624        | 388u.00   | fast alcohol screening test                                  | 1                             | 0                            | 0                                          | 0                    | 1                   |
| 96107        | 38D2.00   | single alcohol screening questionnaire                       | 1                             | 0                            | 0                                          | 0                    | 0                   |
| 94838        | 38D3.00   | alcohol use disorders identification test                    | 1                             | 0                            | 0                                          | 1                    | 0                   |
| 95744        | 38D4.00   | alcohol use disorder identificatn test consumptn questionre  | 1                             | 0                            | 0                                          | 1                    | 0                   |
| 97501        | 38D5.00   | alcoh use disor id test piccinelli consumption questionnaire | 1                             | 0                            | 0                                          | 1                    | 0                   |
| 100493       | 38Df.00   | five-shot questionnaire on heavy drinking                    | 1                             | 0                            | 0                                          | 0                    | 0                   |
| 102577       | 38Dz.00   | severity of alcohol dependence questionnaire                 | 1                             | 0                            | 0                                          | 0                    | 0                   |
| 102770       | 38Dz.11   | sadq - severity of alcohol dependence questionnaire          | 1                             | 0                            | 0                                          | 0                    | 0                   |

| CPRD medcode | Read code | Clinical term                                                | 1<br>Any alcohol-related code | 2<br>Current drinking status | 3<br>Codes indicating level of alcohol use | 4<br>AUDIT screening | 5<br>FAST screening |
|--------------|-----------|--------------------------------------------------------------|-------------------------------|------------------------------|--------------------------------------------|----------------------|---------------------|
| 100989       | 4I91.11   | breath alcohol level                                         | 1                             | 0                            | 0                                          | 0                    | 0                   |
| 17266        | 63C7.00   | maternal alcohol abuse                                       | 1                             | 0                            | 0                                          | 0                    | 0                   |
| 12442        | 66e..00   | alcohol disorder monitoring                                  | 1                             | curr                         | 0                                          | 0                    | 0                   |
| 32964        | 66e0.00   | alcohol abuse monitoring                                     | 1                             | 0                            | 0                                          | 0                    | 0                   |
| 11491        | 6792.00   | health ed. - alcohol                                         | 1                             | 0                            | 0                                          | 0                    | 0                   |
| 35859        | 67A5.00   | pregnancy alcohol advice                                     | 1                             | 0                            | 0                                          | 0                    | 0                   |
| 18711        | 67H0.00   | lifestyle advice regarding alcohol                           | 1                             | 0                            | 0                                          | 0                    | 0                   |
| 105144       | 67K6.00   | cycle of change stage, alcohol                               | 1                             | 0                            | 0                                          | 0                    | 0                   |
| 19489        | 6892.00   | alcohol consumption screen                                   | 1                             | 0                            | 0                                          | 0                    | 0                   |
| 9264         | 68S..00   | alcohol consumption screen                                   | 1                             | 0                            | 0                                          | 0                    | 0                   |
| 56410        | 7P22100   | delivery of rehabilitation for alcohol addiction             | 1                             | 0                            | 0                                          | 0                    | 0                   |
| 2083         | 8BA8.00   | alcohol detoxification                                       | 1                             | 0                            | 0                                          | 0                    | 0                   |
| 7692         | 8CAM.00   | patient advised about alcohol                                | 1                             | 0                            | 0                                          | 0                    | 0                   |
| 102564       | 8CAM000   | advised to abstain from alcohol consumption                  | 1                             | 0                            | 0                                          | 0                    | 0                   |
| 97309        | 8CAv.00   | advised to contact primary care alcohol worker               | 1                             | curr                         | 0                                          | 0                    | 0                   |
| 37264        | 8CE1.00   | alcohol leaflet given                                        | 1                             | 0                            | 0                                          | 0                    | 0                   |
| 29691        | 8G32.00   | aversion therapy - alcoholism                                | 1                             | 0                            | 0                                          | 0                    | 0                   |
| 21650        | 8H35.00   | admitted to alcohol detoxification centre                    | 1                             | 0                            | 0                                          | 0                    | 0                   |
| 9849         | 8H7p.00   | referral to community alcohol team                           | 1                             | 0                            | 0                                          | 0                    | 0                   |
| 12554        | 8HHe.00   | referral to community drug and alcohol team                  | 1                             | 0                            | 0                                          | 0                    | 0                   |
| 94553        | 8HkG.00   | referral to specialist alcohol treatment service             | 1                             | 0                            | 0                                          | 0                    | 0                   |
| 96993        | 8HkJ.00   | referral to alcohol brief intervention service               | 1                             | 0                            | 0                                          | 0                    | 0                   |
| 94669        | 8IA7.00   | alcohol consumption screening test declined                  | 1                             | 0                            | 0                                          | 0                    | 0                   |
| 97261        | 8IAF.00   | brief intervention for excessive alcohol consumptn declined  | 1                             | curr                         | 0                                          | 0                    | 0                   |
| 97680        | 8IAJ.00   | declined referral to specialist alcohol treatment service    | 1                             | curr                         | 0                                          | 0                    | 0                   |
| 102247       | 8IAt.00   | extended interven for excessive alcohol consumption declined | 1                             | curr                         | 0                                          | 0                    | 0                   |
| 103459       | 8IEA.00   | referral to community alcohol team declined                  | 1                             | curr                         | 0                                          | 0                    | 0                   |
| 43813        | 9EQ..11   | police:venesect-alcohol                                      | 1                             | 0                            | 0                                          | 0                    | 0                   |
| 102121       | 9EQ..12   | police:venesect-alcohol                                      | 1                             | 0                            | 0                                          | 0                    | 0                   |
| 11740        | 9k1..00   | alcohol misuse - enhanced services administration            | 1                             | curr                         | 0                                          | 0                    | 0                   |
| 35330        | 9k11.00   | alcohol consumption counselling                              | 1                             | curr                         | 0                                          | 0                    | 0                   |
| 63529        | 9k12.00   | alcohol misuse - enhanced service completed                  | 1                             | 0                            | 0                                          | 0                    | 0                   |

| CPRD medcode | Read code | Clinical term                                                            | 1<br>Any alcohol-related code | 2<br>Current drinking status | 3<br>Codes indicating level of alcohol use | 4<br>AUDIT screening | 5<br>FAST screening |
|--------------|-----------|--------------------------------------------------------------------------|-------------------------------|------------------------------|--------------------------------------------|----------------------|---------------------|
| 48545        | 9k13.00   | alcohol questionnaire completed                                          | 1                             | 0                            | 0                                          | 0                    | 0                   |
| 47123        | 9k14.00   | alcohol counselling by other agencies                                    | 1                             | 0                            | 0                                          | 0                    | 0                   |
| 90714        | 9k15.00   | alcohol screen - audit completed                                         | 1                             | 0                            | 0                                          | 1                    | 0                   |
| 94963        | 9k16.00   | alcohol screen - fast alcohol screening test completed                   | 1                             | 0                            | 0                                          | 0                    | 1                   |
| 95663        | 9k17.00   | alcohol screen - audit c completed                                       | 1                             | 0                            | 0                                          | 1                    | 0                   |
| 94485        | 9k18.00   | alcohol screen - audit pc completed                                      | 1                             | 0                            | 0                                          | 1                    | 0                   |
| 95944        | 9k19.00   | alcohol assesment declined - enhanced services admin                     | 1                             | 0                            | 0                                          | 0                    | 0                   |
| 96259        | 9k19.11   | alcohol assessment declined                                              | 1                             | 0                            | 0                                          | 0                    | 0                   |
| 96053        | 9k1A.00   | brief intervention for excessive alcohol consump <sup>tn</sup> completed | 1                             | 0                            | 0                                          | 0                    | 0                   |
| 96054        | 9k1B.00   | extended intervention for excessive alcohol consump <sup>tn</sup> complt | 1                             | 0                            | 0                                          | 0                    | 0                   |
| 9489         | 9NN2.00   | under care of community alcohol team                                     | 1                             | 0                            | 0                                          | 0                    | 0                   |
| 65754        | C150500   | alcohol-induced pseudo-cushing's syndrome                                | 1                             | 0                            | 0                                          | 0                    | 0                   |
| 16237        | E01..00   | alcoholic psychoses                                                      | 1                             | 0                            | 0                                          | 0                    | 0                   |
| 16225        | E010.00   | alcohol withdrawal delirium                                              | 1                             | curr                         | 0                                          | 0                    | 0                   |
| 22277        | E010.11   | dts - delirium tremens                                                   | 1                             | curr                         | 0                                          | 0                    | 0                   |
| 1476         | E010.12   | Delirium tremens                                                         | 1                             | curr                         | 0                                          | 0                    | 0                   |
| 20762        | E011.00   | alcohol amnestic syndrome                                                | 1                             | 0                            | 0                                          | 0                    | 0                   |
| 4500         | E011000   | korsakov's alcoholic psychosis                                           | 1                             | 0                            | 0                                          | 0                    | 0                   |
| 11106        | E011100   | korsakov's alcoholic psychosis with peripheral neuritis                  | 1                             | 0                            | 0                                          | 0                    | 0                   |
| 18636        | E011200   | wernicke-korsakov syndrome                                               | 1                             | 0                            | 0                                          | 0                    | 0                   |
| 41920        | E011z00   | alcohol amnestic syndrome nos                                            | 1                             | 0                            | 0                                          | 0                    | 0                   |
| 54505        | E012.00   | other alcoholic dementia                                                 | 1                             | 0                            | 0                                          | 0                    | 0                   |
| 27342        | E012.11   | alcoholic dementia nos                                                   | 1                             | 0                            | 0                                          | 0                    | 0                   |
| 37946        | E012000   | chronic alcoholic brain syndrome                                         | 1                             | 0                            | 0                                          | 0                    | 0                   |
| 25110        | E013.00   | alcohol withdrawal hallucinosis                                          | 1                             | curr                         | 0                                          | 0                    | 0                   |
| 57939        | E014.00   | pathological alcohol intoxication                                        | 1                             | curr                         | 0                                          | 0                    | 0                   |
| 20407        | E014.11   | drunkenness - pathological                                               | 1                             | curr                         | 0                                          | 0                    | 0                   |
| 30404        | E015.00   | alcoholic paranoia                                                       | 1                             | curr                         | 0                                          | 0                    | 0                   |
| 33670        | E01y.00   | other alcoholic psychosis                                                | 1                             | 0                            | 0                                          | 0                    | 0                   |
| 2082         | E01y000   | alcohol withdrawal syndrome                                              | 1                             | curr                         | 0                                          | 0                    | 0                   |
| 68111        | E01yz00   | other alcoholic psychosis nos                                            | 1                             | 0                            | 0                                          | 0                    | 0                   |
| 67651        | E01z.00   | alcoholic psychosis nos                                                  | 1                             | 0                            | 0                                          | 0                    | 0                   |

| CPRD medcode | Read code | Clinical term                                                | 1<br>Any alcohol-related code | 2<br>Current drinking status | 3<br>Codes indicating level of alcohol use | 4<br>AUDIT screening | 5<br>FAST screening |
|--------------|-----------|--------------------------------------------------------------|-------------------------------|------------------------------|--------------------------------------------|----------------------|---------------------|
| 2084         | E23..00   | alcohol dependence syndrome                                  | 1                             | curr                         | 0                                          | 0                    | 0                   |
| 2081         | E23..11   | alcoholism                                                   | 1                             | curr                         | 0                                          | 0                    | 0                   |
| 1399         | E23..12   | alcohol problem drinking                                     | 1                             | curr                         | H                                          | 0                    | 0                   |
| 5740         | E230.00   | acute alcoholic intoxication in alcoholism                   | 1                             | curr                         | 0                                          | 0                    | 0                   |
| 57714        | E230.11   | alcohol dependence with acute alcoholic intoxication         | 1                             | curr                         | 0                                          | 0                    | 0                   |
| 40530        | E230000   | acute alcoholic intoxication, unspecified, in alcoholism     | 1                             | curr                         | 0                                          | 0                    | 0                   |
| 56947        | E230100   | continuous acute alcoholic intoxication in alcoholism        | 1                             | curr                         | 0                                          | 0                    | 0                   |
| 21624        | E230200   | episodic acute alcoholic intoxication in alcoholism          | 1                             | curr                         | 0                                          | 0                    | 0                   |
| 59574        | E230300   | acute alcoholic intoxication in remission, in alcoholism     | 1                             | 0                            | 0                                          | 0                    | 0                   |
| 36296        | E230z00   | acute alcoholic intoxication in alcoholism nos               | 1                             | curr                         | 0                                          | 0                    | 0                   |
| 31443        | E231.00   | chronic alcoholism                                           | 1                             | curr                         | 0                                          | 0                    | 0                   |
| 37605        | E231.11   | Dipsomania                                                   | 1                             | curr                         | 0                                          | 0                    | 0                   |
| 43193        | E231000   | unspecified chronic alcoholism                               | 1                             | curr                         | 0                                          | 0                    | 0                   |
| 24064        | E231100   | continuous chronic alcoholism                                | 1                             | curr                         | 0                                          | 0                    | 0                   |
| 26106        | E231200   | episodic chronic alcoholism                                  | 1                             | curr                         | 0                                          | 0                    | 0                   |
| 24485        | E231300   | chronic alcoholism in remission                              | 1                             | 0                            | 0                                          | 0                    | 0                   |
| 33635        | E231z00   | chronic alcoholism nos                                       | 1                             | curr                         | 0                                          | 0                    | 0                   |
| 6169         | E23z.00   | alcohol dependence syndrome nos                              | 1                             | curr                         | 0                                          | 0                    | 0                   |
| 7746         | E250.00   | nondependent alcohol abuse                                   | 1                             | curr                         | H                                          | 0                    | 0                   |
| 12271        | E250.11   | Drunkenness NOS                                              | 1                             | curr                         | 0                                          | 0                    | 0                   |
| 27518        | E250.12   | hangover (alcohol)                                           | 1                             | curr                         | 0                                          | 0                    | 0                   |
| 17777        | E250.13   | Inebriety NOS                                                | 1                             | curr                         | 0                                          | 0                    | 0                   |
| 3782         | E250.14   | intoxication - alcohol                                       | 1                             | curr                         | 0                                          | 0                    | 0                   |
| 669          | E250000   | nondependent alcohol abuse, unspecified                      | 1                             | curr                         | H                                          | 0                    | 0                   |
| 23610        | E250100   | nondependent alcohol abuse, continuous                       | 1                             | curr                         | H                                          | 0                    | 0                   |
| 12974        | E250200   | nondependent alcohol abuse, episodic                         | 1                             | curr                         | H                                          | 0                    | 0                   |
| 31569        | E250300   | nondependent alcohol abuse in remission                      | 1                             | 0                            | 0                                          | 0                    | 0                   |
| 28150        | E250z00   | nondependent alcohol abuse nos                               | 1                             | curr                         | H                                          | 0                    | 0                   |
| 5611         | Eu10.00   | [x]mental and behavioural disorders due to use of alcohol    | 1                             | 0                            | 0                                          | 0                    | 0                   |
| 44299        | Eu10000   | [x]mental & behav dis due to use alcohol: acute intoxication | 1                             | curr                         | 0                                          | 0                    | 0                   |
| 9508         | Eu10011   | [x]acute alcoholic drunkenness                               | 1                             | curr                         | 0                                          | 0                    | 0                   |
| 21879        | Eu10100   | [x]mental and behav dis due to use of alcohol: harmful use   | 1                             | curr                         | 0                                          | 0                    | 0                   |

| CPRD medcode | Read code | Clinical term                                                | 1<br>Any alcohol-related code | 2<br>Current drinking status | 3<br>Codes indicating level of alcohol use | 4<br>AUDIT screening | 5<br>FAST screening |
|--------------|-----------|--------------------------------------------------------------|-------------------------------|------------------------------|--------------------------------------------|----------------------|---------------------|
| 39327        | Eu10200   | [x]mental and behav dis due to use alcohol: dependence syndr | 1                             | curr                         | 0                                          | 0                    | 0                   |
| 28780        | Eu10211   | [x]alcohol addiction                                         | 1                             | curr                         | 0                                          | 0                    | 0                   |
| 5758         | Eu10212   | [x]chronic alcoholism                                        | 1                             | curr                         | 0                                          | 0                    | 0                   |
| 20514        | Eu10300   | [x]mental and behav dis due to use alcohol: withdrawal state | 1                             | curr                         | 0                                          | 0                    | 0                   |
| 64101        | Eu10400   | [X]Men & behav dis due alcoh: withdrawl state with delirium  | 1                             | curr                         | 0                                          | 0                    | 0                   |
| 17259        | Eu10411   | [x]delirium tremens, alcohol induced                         | 1                             | curr                         | 0                                          | 0                    | 0                   |
| 12353        | Eu10500   | [x]mental & behav dis due to use alcohol: psychotic disorder | 1                             | 0                            | 0                                          | 0                    | 0                   |
| 6467         | Eu10511   | [x]alcoholic hallucinosis                                    | 1                             | curr                         | 0                                          | 0                    | 0                   |
| 65932        | Eu10512   | [x]alcoholic jealousy                                        | 1                             | curr                         | 0                                          | 0                    | 0                   |
| 30162        | Eu10513   | [x]alcoholic paranoia                                        | 1                             | curr                         | 0                                          | 0                    | 0                   |
| 17607        | Eu10514   | [x]alcoholic psychosis nos                                   | 1                             | 0                            | 0                                          | 0                    | 0                   |
| 39799        | Eu10600   | [x]mental and behav dis due to use alcohol: amnesic syndrome | 1                             | 0                            | 0                                          | 0                    | 0                   |
| 11670        | Eu10611   | [x]korsakov's psychosis, alcohol induced                     | 1                             | 0                            | 0                                          | 0                    | 0                   |
| 62000        | Eu10700   | [X]Men & behav dis due alcoh: resid & late-onset psychot dis | 1                             | 0                            | 0                                          | 0                    | 0                   |
| 26323        | Eu10711   | [x]alcoholic dementia nos                                    | 1                             | 0                            | 0                                          | 0                    | 0                   |
| 37691        | Eu10712   | [x]chronic alcoholic brain syndrome                          | 1                             | 0                            | 0                                          | 0                    | 0                   |
| 32927        | Eu10800   | [x]alcohol withdrawal-induced seizure                        | 1                             | curr                         | 0                                          | 0                    | 0                   |
| 45169        | Eu10y00   | [x]men & behav dis due to use alcohol: oth men & behav dis   | 1                             | 0                            | 0                                          | 0                    | 0                   |
| 64389        | Eu10z00   | [x]ment & behav dis due use alcohol: unsp ment & behav dis   | 1                             | 0                            | 0                                          | 0                    | 0                   |
| 36748        | F11x011   | alcoholic encephalopathy                                     | 1                             | 0                            | 0                                          | 0                    | 0                   |
| 33839        | F144000   | cerebellar ataxia due to alcoholism                          | 1                             | 0                            | 0                                          | 0                    | 0                   |
| 30604        | F25B.00   | alcohol-induced epilepsy                                     | 1                             | 0                            | 0                                          | 0                    | 0                   |
| 2925         | F375.00   | alcoholic polyneuropathy                                     | 1                             | 0                            | 0                                          | 0                    | 0                   |
| 31742        | F394100   | alcoholic myopathy                                           | 1                             | 0                            | 0                                          | 0                    | 0                   |
| 4915         | G555.00   | alcoholic cardiomyopathy                                     | 1                             | 0                            | 0                                          | 0                    | 0                   |
| 8363         | G852300   | oesophageal varices in alcoholic cirrhosis of the liver      | 1                             | 0                            | 0                                          | 0                    | 0                   |
| 4506         | J153.00   | alcoholic gastritis                                          | 1                             | 0                            | 0                                          | 0                    | 0                   |
| 10691        | J610.00   | alcoholic fatty liver                                        | 1                             | 0                            | 0                                          | 0                    | 0                   |
| 3216         | J611.00   | acute alcoholic hepatitis                                    | 1                             | 0                            | 0                                          | 0                    | 0                   |
| 4743         | J612.00   | alcoholic cirrhosis of liver                                 | 1                             | 0                            | 0                                          | 0                    | 0                   |
| 21713        | J612000   | alcoholic fibrosis and sclerosis of liver                    | 1                             | 0                            | 0                                          | 0                    | 0                   |
| 7885         | J613.00   | alcoholic liver damage unspecified                           | 1                             | 0                            | 0                                          | 0                    | 0                   |

| CPRD medcode | Read code | Clinical term                                                | 1<br>Any alcohol-related code | 2<br>Current drinking status | 3<br>Codes indicating level of alcohol use | 4<br>AUDIT screening | 5<br>FAST screening |
|--------------|-----------|--------------------------------------------------------------|-------------------------------|------------------------------|--------------------------------------------|----------------------|---------------------|
| 17330        | J613000   | alcoholic hepatic failure                                    | 1                             | 0                            | 0                                          | 0                    | 0                   |
| 7943         | J617.00   | alcoholic hepatitis                                          | 1                             | 0                            | 0                                          | 0                    | 0                   |
| 7602         | J617000   | chronic alcoholic hepatitis                                  | 1                             | 0                            | 0                                          | 0                    | 0                   |
| 104611       | J670800   | alcohol-induced acute pancreatitis                           | 1                             | 0                            | 0                                          | 0                    | 0                   |
| 24984        | J671000   | alcohol-induced chronic pancreatitis                         | 1                             | 0                            | 0                                          | 0                    | 0                   |
| 66019        | L254.11   | suspect fetal damage from maternal alcohol                   | 1                             | 0                            | 0                                          | 0                    | 0                   |
| 27670        | L255300   | maternal care for (suspected) damage to fetus from alcohol   | 1                             | 0                            | 0                                          | 0                    | 0                   |
| 72757        | Q007100   | fetus/neonate affected by placental/breast transfer alcohol  | 1                             | 0                            | 0                                          | 0                    | 0                   |
| 97916        | Q007111   | fetal alcohol syndrome                                       | 1                             | 0                            | 0                                          | 0                    | 0                   |
| 9169         | R103.00   | [d]alcohol blood level excessive                             | 1                             | 0                            | 0                                          | 0                    | 0                   |
| 36687        | SLH3.00   | alcohol deterrent poisoning                                  | 1                             | 0                            | 0                                          | 0                    | 0                   |
| 19217        | SM0..00   | alcohol causing toxic effect                                 | 1                             | 0                            | 0                                          | 0                    | 0                   |
| 8984         | SM00.00   | ethyl alcohol causing toxic effect                           | 1                             | 0                            | 0                                          | 0                    | 0                   |
| 48514        | SM00100   | denatured alcohol causing toxic effect                       | 1                             | 0                            | 0                                          | 0                    | 0                   |
| 55536        | SM00z00   | ethyl alcohol causing toxic effect nos                       | 1                             | 0                            | 0                                          | 0                    | 0                   |
| 88997        | SM01.00   | methyl alcohol causing toxic effect                          | 1                             | 0                            | 0                                          | 0                    | 0                   |
| 11263        | SM01100   | wood alcohol causing toxic effect                            | 1                             | 0                            | 0                                          | 0                    | 0                   |
| 106018       | SM02.00   | isopropyl alcohol causing toxic effect                       | 1                             | 0                            | 0                                          | 0                    | 0                   |
| 102086       | SM02200   | rubbing alcohol causing toxic effect                         | 1                             | 0                            | 0                                          | 0                    | 0                   |
| 64396        | SM03000   | amyl alcohol causing toxic effect                            | 1                             | 0                            | 0                                          | 0                    | 0                   |
| 102321       | SM03100   | butyl alcohol causing toxic effect                           | 1                             | 0                            | 0                                          | 0                    | 0                   |
| 101543       | SM0y.00   | other alcohol causing toxic effect                           | 1                             | 0                            | 0                                          | 0                    | 0                   |
| 36499        | SM0z.00   | alcohol causing toxic effect nos                             | 1                             | 0                            | 0                                          | 0                    | 0                   |
| 95410        | SyuG000   | [x]toxic effect of other alcohols                            | 1                             | 0                            | 0                                          | 0                    | 0                   |
| 18252        | T90..00   | accidental poisoning by alcohol, nec                         | 1                             | 0                            | 0                                          | 0                    | 0                   |
| 40541        | T900.00   | accidental poisoning by alcoholic beverages                  | 1                             | 0                            | 0                                          | 0                    | 0                   |
| 15503        | T901.00   | accidental poisoning by other ethyl alcohol and its products | 1                             | 0                            | 0                                          | 0                    | 0                   |
| 101426       | T901z00   | accidental poisoning by ethyl alcohol nos                    | 1                             | 0                            | 0                                          | 0                    | 0                   |
| 37174        | T902.00   | accidental poisoning by methyl alcohol                       | 1                             | 0                            | 0                                          | 0                    | 0                   |
| 60752        | T903300   | accidental poisoning by secondary propyl alcohol             | 1                             | 0                            | 0                                          | 0                    | 0                   |
| 53139        | T90y.00   | accidental poisoning by other alcohols                       | 1                             | 0                            | 0                                          | 0                    | 0                   |
| 55415        | T90z.00   | accidental poisoning by alcohol nos                          | 1                             | 0                            | 0                                          | 0                    | 0                   |



| CPRD medcode | Read code | Clinical term                                                 | 1<br>Any alcohol-related code | 2<br>Current drinking status | 3<br>Codes indicating level of alcohol use | 4<br>AUDIT screening | 5<br>FAST screening |
|--------------|-----------|---------------------------------------------------------------|-------------------------------|------------------------------|--------------------------------------------|----------------------|---------------------|
| 21412        | TJH3.00   | adverse reaction to alcohol deterrents                        | 1                             | 0                            | 0                                          | 0                    | 0                   |
| 31605        | U1A9.00   | [x]accident poisoning/exposure to alcohol                     | 1                             | 0                            | 0                                          | 0                    | 0                   |
| 63306        | U1A9000   | [x]accident poison/exposure to alcohol at home                | 1                             | 0                            | 0                                          | 0                    | 0                   |
| 103069       | U1A9200   | [x]acc poison/expos alcohol school/pub admin area             | 1                             | 0                            | 0                                          | 0                    | 0                   |
| 104702       | U1A9300   | [x]accid pois/expos alcohol in sport/athletic area            | 1                             | 0                            | 0                                          | 0                    | 0                   |
| 63876        | U1A9400   | [x]accid poison/expos alcohol in street/highway               | 1                             | 0                            | 0                                          | 0                    | 0                   |
| 92908        | U1A9500   | [x]accid poison/expos alcohol trade/service area              | 1                             | 0                            | 0                                          | 0                    | 0                   |
| 104734       | U1A9y00   | [x]accid pois/expos to alcohol other spec place               | 1                             | 0                            | 0                                          | 0                    | 0                   |
| 61187        | U1A9z00   | [x]accid poison/expos to alcohol unspecif place               | 1                             | 0                            | 0                                          | 0                    | 0                   |
| 10463        | U209.00   | [x]intent self poison/exposure to alcohol                     | 1                             | 0                            | 0                                          | 0                    | 0                   |
| 41638        | U209000   | [x]int self poison/exposure to alcohol at home                | 1                             | 0                            | 0                                          | 0                    | 0                   |
| 97085        | U209y00   | [x]int self poison alcohol other spec place                   | 1                             | 0                            | 0                                          | 0                    | 0                   |
| 59414        | U209z00   | [x]intent self poison alcohol unspecif place                  | 1                             | 0                            | 0                                          | 0                    | 0                   |
| 30036        | U409.00   | [x]poisoning/exposure, ? intent, to alcohol                   | 1                             | 0                            | 0                                          | 0                    | 0                   |
| 68159        | U409000   | [x]poison/exposure ?intent, to alcohol at home                | 1                             | 0                            | 0                                          | 0                    | 0                   |
| 69407        | U409200   | [x]pois/exp ?intent alcohol school/pub admin area             | 1                             | 0                            | 0                                          | 0                    | 0                   |
| 96219        | U409400   | [x]pois/expos ?intent alcohol in street/highway               | 1                             | 0                            | 0                                          | 0                    | 0                   |
| 61190        | U409z00   | [x]pois/expos ?intent to alcohol unspecif place               | 1                             | 0                            | 0                                          | 0                    | 0                   |
| 73876        | U60H300   | [x]alcohol deterrents caus adverse effects in therapeut use   | 1                             | 0                            | 0                                          | 0                    | 0                   |
| 48241        | U60H311   | [x] adverse reaction to alcohol deterrents                    | 1                             | 0                            | 0                                          | 0                    | 0                   |
| 44019        | U80..00   | [x]evidence of alcoh involv determin by blood alcoh level     | 1                             | 0                            | 0                                          | 0                    | 0                   |
| 12950        | U800.00   | [x]eviden of alcoh involv blood alcoh level <20 mg/100 ml     | 1                             | 0                            | 0                                          | 0                    | 0                   |
| 57202        | U801.00   | [x]eviden of alcoh involv blood alcoh level 20-39mg/100ml     | 1                             | 0                            | 0                                          | 0                    | 0                   |
| 59079        | U802.00   | [x]eviden of alcoh involv blood alcoh level 40-59mg/100ml     | 1                             | 0                            | 0                                          | 0                    | 0                   |
| 57242        | U803.00   | [x]eviden of alcoh involv blood alcoh level 60-79mg/100ml     | 1                             | 0                            | 0                                          | 0                    | 0                   |
| 53428        | U804.00   | [x]eviden of alcoh involv blood alcoh level 80-99mg/100ml     | 1                             | 0                            | 0                                          | 0                    | 0                   |
| 54504        | U805.00   | [x]eviden of alcoh involv blood alcoh level 100-119mg/100ml   | 1                             | 0                            | 0                                          | 0                    | 0                   |
| 32454        | U806.00   | [x]eviden of alcoh involv blood alcoh level 120-199mg/100ml   | 1                             | 0                            | 0                                          | 0                    | 0                   |
| 47907        | U807.00   | [x]eviden of alcoh involv blood alcoh level 200-239mg/100ml   | 1                             | 0                            | 0                                          | 0                    | 0                   |
| 39726        | U808.00   | [x]eviden alcoh involv blood alcoh level 240mg/100ml or more  | 1                             | 0                            | 0                                          | 0                    | 0                   |
| 103698       | U80z.00   | [x]evid alcoh involv detrm by pres alcoh in bld levl not spec | 1                             | 0                            | 0                                          | 0                    | 0                   |
| 23978        | U81..00   | [x]evid of alcohol involv determind by level of intoxication  | 1                             | 0                            | 0                                          | 0                    | 0                   |

| CPRD medcode | Read code | Clinical term                                                | 1<br>Any alcohol-related code | 2<br>Current drinking status | 3<br>Codes indicating level of alcohol use | 4<br>AUDIT screening | 5<br>FAST screening |
|--------------|-----------|--------------------------------------------------------------|-------------------------------|------------------------------|--------------------------------------------|----------------------|---------------------|
| 105273       | U810.00   | [x]evid alcoh invol determ by lev of intox mild alcoh intox  | 1                             | 0                            | 0                                          | 0                    | 0                   |
| 73480        | U811.00   | [x]evid alcoh invol determ by level of intox mod alcoh intox | 1                             | 0                            | 0                                          | 0                    | 0                   |
| 44686        | U812.00   | [x]evid alcoh invol determ by level of intox sev alcoh intox | 1                             | 0                            | 0                                          | 0                    | 0                   |
| 39738        | U813.00   | [x]evid alcoh invl determ by levl intox very sev alcoh intox | 1                             | 0                            | 0                                          | 0                    | 0                   |
| 41983        | Z191.00   | alcohol detoxification                                       | 1                             | 0                            | 0                                          | 0                    | 0                   |
| 46677        | Z191100   | alcohol withdrawal regime                                    | 1                             | 0                            | 0                                          | 0                    | 0                   |
| 61383        | Z191200   | planned reduction of alcohol consumption                     | 1                             | curr                         | 0                                          | 0                    | 0                   |
| 95181        | Z191211   | alcohol reduction programme                                  | 1                             | curr                         | 0                                          | 0                    | 0                   |
| 64409        | Z191400   | self-monitoring of alcohol intake                            | 1                             | 0                            | 0                                          | 0                    | 0                   |
| 30460        | Z4B1.00   | alcoholism counselling                                       | 1                             | curr                         | 0                                          | 0                    | 0                   |
| 21829        | Z786200   | drinking practice                                            | 1                             | 0                            | 0                                          | 0                    | 0                   |
| 95650        | ZC22100   | advice to change drink intake                                | 1                             | curr                         | 0                                          | 0                    | 0                   |
| 97163        | ZC22200   | advice to change alcoholic drink intake                      | 1                             | curr                         | 0                                          | 0                    | 0                   |
| 54209        | ZC2H.00   | advice to change alcohol intake                              | 1                             | curr                         | 0                                          | 0                    | 0                   |
| 11140        | ZG23100   | advice on alcohol consumption                                | 1                             | 0                            | 0                                          | 0                    | 0                   |
| 50507        | ZR1E.00   | alcohol dependence scale                                     | 1                             | 0                            | 0                                          | 0                    | 0                   |
| 40602        | ZR1E.11   | ads - alcohol dependence scale                               | 1                             | 0                            | 0                                          | 0                    | 0                   |
| 32850        | ZR1F.00   | alcohol use disorders identification test                    | 1                             | 0                            | 0                                          | 1                    | 0                   |
| 59873        | ZR1F.11   | audit - alcohol use disorders identification test            | 1                             | 0                            | 0                                          | 1                    | 0                   |
| 65980        | ZR1G.00   | alcohol use inventory                                        | 1                             | 0                            | 0                                          | 0                    | 0                   |
| 45557        | ZR31.00   | cage questionnaire                                           | 1                             | 0                            | 0                                          | 0                    | 0                   |
| 61750        | ZR3f.00   | comprehensive drinker profile                                | 1                             | 0                            | 0                                          | 0                    | 0                   |
| 63457        | ZR3f.11   | cdp - comprehensive drinker profile                          | 1                             | 0                            | 0                                          | 0                    | 0                   |
| 56441        | ZRa1.00   | michigan alcoholism screening test                           | 1                             | 0                            | 0                                          | 0                    | 0                   |
| 69331        | ZRa1.11   | mast - michigan alcoholism screening test                    | 1                             | 0                            | 0                                          | 0                    | 0                   |
| 99985        | ZRa1100   | brief michigan alcoholism screening test                     | 1                             | 0                            | 0                                          | 0                    | 0                   |
| 41251        | ZRa1111   | bmast - brief michigan alcoholism screening test             | 1                             | 0                            | 0                                          | 0                    | 0                   |
| 70939        | ZRaU.00   | munich alcoholism test                                       | 1                             | 0                            | 0                                          | 0                    | 0                   |
| 22707        | ZRBJ.00   | drinking problem scale                                       | 1                             | 0                            | 0                                          | 0                    | 0                   |
| 46848        | ZRBJ.11   | dps - drinking problem scale                                 | 1                             | 0                            | 0                                          | 0                    | 0                   |
| 42305        | ZRk6.00   | severity of alcohol dependence questionnaire                 | 1                             | 0                            | 0                                          | 0                    | 0                   |
| 66831        | ZRk6.11   | sadq - severity of alcohol dependence questionnaire          | 1                             | 0                            | 0                                          | 0                    | 0                   |

| CPRD medcode | Read code | Clinical term                                 | 1<br>Any alcohol-related code | 2<br>Current drinking status | 3<br>Codes indicating level of alcohol use | 4<br>AUDIT screening | 5<br>FAST screening |
|--------------|-----------|-----------------------------------------------|-------------------------------|------------------------------|--------------------------------------------|----------------------|---------------------|
| 62300        | ZRk9.00   | short alcohol dependence data                 | 1                             | 0                            | 0                                          | 0                    | 0                   |
| 62299        | ZRk9.11   | sadd - short alcohol dependence data          | 1                             | 0                            | 0                                          | 0                    | 0                   |
| 10658        | ZRLfD12   | honos item 3 - alcohol/drug problem           | 1                             | 0                            | 0                                          | 0                    | 0                   |
| 66552        | ZRR..00   | inventory of drinking situations              | 1                             | 0                            | 0                                          | 0                    | 0                   |
| 59776        | ZRVK.00   | last six months of drinking questionnaire     | 1                             | 0                            | 0                                          | 0                    | 0                   |
| 7123         | ZV11300   | [v]personal history of alcoholism             | 1                             | 0                            | 0                                          | 0                    | 0                   |
| 16587        | ZV11311   | [v]problems related to lifestyle alcohol use  | 1                             | curr                         | H                                          | 0                    | 0                   |
| 7545         | ZV4KC00   | [v] alcohol use                               | 1                             | 0                            | 0                                          | 0                    | 0                   |
| 8388         | ZV57A00   | [v]alcohol rehabilitation                     | 1                             | 0                            | 0                                          | 0                    | 0                   |
| 8030         | ZV6D600   | [v]alcohol abuse counselling and surveillance | 1                             | curr                         | 0                                          | 0                    | 0                   |
| 61583        | ZV70411   | [v]medicolegal blood alcohol test             | 1                             | 0                            | 0                                          | 0                    | 0                   |
| 17149        | ZV70L00   | [v]blood-alcohol and blood-drug test          | 1                             | 0                            | 0                                          | 0                    | 0                   |
| 10458        | ZV79100   | [v]screening for alcoholism                   | 1                             | 0                            | 0                                          | 0                    | 0                   |

**Supplementary Table 2.** Internal validity comparing alcohol consumption recorded up to 30 days before or after an AUDIT score, AUDIT-C score or measure of units per week.

|                                                                                | N (%)          | N patients with<br>AUDIT score on the<br>same date as record |  | AUDIT score |        | N patients with<br>AUDIT C score on<br>the same date as<br>record |  | AUDIT C score |        | N patients with<br>units per week<br>recorded on same<br>date as record |  | Units per week |         |
|--------------------------------------------------------------------------------|----------------|--------------------------------------------------------------|--|-------------|--------|-------------------------------------------------------------------|--|---------------|--------|-------------------------------------------------------------------------|--|----------------|---------|
|                                                                                |                | n (%)                                                        |  | median      | (IQR)  | n (%)                                                             |  | median        | (IQR)  | n (%)                                                                   |  | median         | (IQR)   |
| <b>Current drinking status*</b>                                                |                |                                                              |  |             |        |                                                                   |  |               |        |                                                                         |  |                |         |
| Non                                                                            | 174,970 (20.3) | 3053 (1.7)                                                   |  | 0           | (0-0)  | 1096 (0.6)                                                        |  | 0             | (0-0)  | 882 (0.5)                                                               |  | 0              | (0-1)   |
| Ex                                                                             | 31,526 (3.7)   | 326 (1)                                                      |  | 0           | (0-0)  | 43 (0.1)                                                          |  | 0             | (0-0)  | 999 (3.2)                                                               |  | 0              | (0-1)   |
| Current                                                                        | 655,834 (76.1) | 24402 (3.7)                                                  |  | 3           | (1-5)  | 4707 (0.7)                                                        |  | 3             | (2-5)  | 333,402 (50.8)                                                          |  | 6              | (2-14)  |
| <b>Current drinking level (Read codes)</b>                                     |                |                                                              |  |             |        |                                                                   |  |               |        |                                                                         |  |                |         |
| Non-drinker                                                                    | 222835 (39.9)  | 3437 (1.5)                                                   |  | 0           | (0-0)  | 1145 (0.5)                                                        |  | 0             | (0-0)  | 2,715 (1.2)                                                             |  | 0              | (0-2)   |
| Light drinker                                                                  | 255,919 (45.8) | 3,401 (1.3)                                                  |  | 2           | (1-3)  | 1,131 (0.4)                                                       |  | 2             | (1-3)  | 19,777 (7.7)                                                            |  | 3              | (1-8)   |
| Moderate drinker                                                               | 52,070 (9.3)   | 1,205 (2.3)                                                  |  | 1           | (0-4)  | 236 (0.5)                                                         |  | 3             | (2-4)  | 13,024 (25)                                                             |  | 6              | (2-14)  |
| Heavy drinker                                                                  | 27,923 (5)     | 2,906 (10.4)                                                 |  | 6           | (5-9)  | 127 (0.5)                                                         |  | 8             | (6-9)  | 10,572 (37.9)                                                           |  | 18             | (10-30) |
| <b>Units per week</b>                                                          |                |                                                              |  |             |        |                                                                   |  |               |        |                                                                         |  |                |         |
| 0                                                                              | 38,929 (9)     | 1,919 (4.9)                                                  |  | 0           | (0-0)  | 159 (0.4)                                                         |  | 0             | (0-1)  |                                                                         |  |                |         |
| 1-14                                                                           | 298,441 (69.2) | 11,920 (4)                                                   |  | 3           | (2-4)  | 2,273 (0.8)                                                       |  | 3             | (2-4)  | n/a                                                                     |  | n/a            |         |
| 15-42                                                                          | 80,449 (18.6)  | 2,983 (3.7)                                                  |  | 6           | (4-8)  | 412 (0.5)                                                         |  | 5             | (4-7)  |                                                                         |  |                |         |
| 43+                                                                            | 13,575 (3.1)   | 248 (1.8)                                                    |  | 10          | (8-12) | 19 (0.1)                                                          |  | 8             | (5-10) |                                                                         |  |                |         |
| <b>AUDIT C score category</b>                                                  |                |                                                              |  |             |        |                                                                   |  |               |        |                                                                         |  |                |         |
| 0-4; Low risk                                                                  | 16,206 (76.8)  | 4,006 (24.7)                                                 |  | 2           | (0-3)  | n/a                                                               |  | n/a           |        | 2,120 (13.1)                                                            |  | 4              | (2-8)   |
| 5-12; High risk                                                                | 4,893 (23.2)   | 1,160 (23.7)                                                 |  | 6           | (5-7)  |                                                                   |  |               |        | 901 (18.4)                                                              |  | 12             | (7-20)  |
| <b>AUDIT score category</b>                                                    |                |                                                              |  |             |        |                                                                   |  |               |        |                                                                         |  |                |         |
| 0-7; Alcohol Education                                                         | 71,401 (92.5)  |                                                              |  |             |        | 4,899 (6.9)                                                       |  | 2             | (1-4)  | 15,852 (22.2)                                                           |  | 4              | (2-10)  |
| 8-15; Simple Advice                                                            | 5,405 (7)      |                                                              |  |             |        | 242 (4.5)                                                         |  | 9             | (8-10) | 1,605 (29.7)                                                            |  | 20             | (14-30) |
| 16-19; Simple Advice<br>plus Brief Counseling<br>and Continued<br>Monitoring   | 206 (0.3)      | n/a                                                          |  | n/a         |        | 0 (0)                                                             |  | (-)           |        | 49 (23.8)                                                               |  | 24             | (16-48) |
| 20-40; Referral to<br>Specialist for Diagnostic<br>Evaluation and<br>Treatment | 200 (0.3)      |                                                              |  |             |        | 0 (0)                                                             |  | (-)           |        | 30 (15)                                                                 |  | 47             | (20-80) |

\*based on recorded status in Read codes and Additional details (not including derived status based on units consumed or AUDIT score)

## References

1. Denaxas, S.C., et al., *Data resource profile: cardiovascular disease research using linked bespoke studies and electronic health records (CALIBER)*. *Int J Epidemiol*, 2012. **41**(6): p. 1625-38.
2. Department of Health, *UK Chief Medical Officers' alcohol guidelines review: Summary of the proposed new guidelines*. 2016.
3. Babor, T.F., et al. *The Alcohol Use Disorders Identification Test: Guidelines for Use in Primary Care*. 2001; Available from: [http://www.talkingalcohol.com/files/pdfs/WHO\\_audit.pdf](http://www.talkingalcohol.com/files/pdfs/WHO_audit.pdf).
